# Supplementary material for: The Mitochondrial Genome of the Phytopathogenic Fungus Bipolaris sorokiniana and the Utility of Mitochondrial Genome to Infer Phylogeny of Dothideomycetes
Source: Front Microbiol. 2020 May 8;11:863. doi: 10.3389/fmicb.2020.00863 (PMC7225605; doi:10.3389/fmicb.2020.00863)
Supplement: Supplementary file 1 [file Table_1.XLSX]

## Sheet: Sheet1
Supplementary Table 1 A. The partitioning scheme and best-fitting modes selected for the dataset of PCG-rrn, using PartitionFinder 2.
Subset	Subset Partitions	Best Model
		IQTREE	MrBayes
1	nad2, nad3, nad4, atp6, nad6, nad4L, nad1	GTR+I+G	GTR+I+G
2	cob	GTR+G	GTR+G
3	cox1, cox2	GTR+G	GTR+G
4	cox3	GTR+G	GTR+G
5	nad5	GTR+G	GTR+G
6	rrnS, rrnL	GTR+I+G	GTR+I+G
Supplementary Table 1 B. The partitioning scheme and best-fitting modes selected for the dataset of PCG_nt, using PartitionFinder 2.
Subset	Subset Partitions	Best Model
		IQTREE	MrBayes
1	atp6	TIM+I+G	GTR+I+G
2	cob	TIM+G	GTR+G
3	cox1	GTR+G	GTR+G
4	cox2	GTR+G	GTR+G
5	cox3	GTR+G	GTR+G
6	nad1	GTR+I+G	GTR+I+G
7	nad2	GTR+I+G	GTR+I+G
8	nad3	GTR+I+G	GTR+I+G
9	nad4	GTR+I+G	GTR+I+G
10	nad4L	TIM+I+G	GTR+I+G
11	nad5	GTR+I+G	GTR+I+G
12	nad6	GTR+I+G	GTR+I+G
Supplementary Table 1 C. The partitioning scheme and best-fitting modes selected for the dataset of PCG_aa, using PartitionFinder 2.
Subset	Subset Partitions	Best Model
		IQTREE	MrBayes
1	nad4L, nad1, nad4, atp6, nad3, nad6, nad2	MTZOA+G+F	WAG+G
2	cob	PMB+G	WAG+G
3	cox1, cox2	VT+G	VT+G
4	cox3	MTZOA+G	WAG+G
5	nad5	CPREV+G+F	CPREV+G
